# Supplementary material
Source: PubMed Central journal article supplement (PMC8033610)
Supplement: pt0c00201_si_001.pdf [file pt0c00201_si_001.pdf]

## Supporting Information

### Comparative activity and off-target effects in cells of the CHK1 inhibitors MK-8776, SRA737 and LY2606368

Jennifer P. Ditano and Alan Eastman\*

Department of Molecular and Systems Biology  
and  
Norris Cotton Cancer Center  
Geisel School of Medicine at Dartmouth  
Lebanon, NH 03756

\*Corresponding Author: Alan Eastman [Alan.R.Eastman@Dartmouth.edu](mailto:Alan.R.Eastman@Dartmouth.edu)

#### Table of contents

Table S1. GI50 values (average and individual) for growth curves in Figure 1

Table S2 GI50 values and fold resistance for resistant cell lines in Figure 7

Figure S1. Induction of  $\gamma$ H2AX by SRA737 and LY2606368. Original data used to generate Figure 4.

Figure S2. Abrogation of DNA damage-induced cell cycle arrest by CHK1i in sensitive and resistant cell lines. Original data used to generate Figure 5.

Figure S3: Inhibition of protein synthesis by CHK1i. Further analysis of lysates used in Figure 8.

| cell line  | GI50                      |      |            |                          |      |            |                |      |            |
|------------|---------------------------|------|------------|--------------------------|------|------------|----------------|------|------------|
|            | MK-8776 ( $\mu\text{M}$ ) |      |            | SRA737 ( $\mu\text{M}$ ) |      |            | LY2606368 (nM) |      |            |
|            | 24 h                      | 48 h | continuous | 24 h                     | 48 h | continuous | 24 h           | 48 h | continuous |
| HCT116     | 50                        | 30   | 5          | 22                       | 14   | 12         | 300            | 100  | 80         |
| U251       | 30                        | 9    | 2.5        | 30                       | 30   | 9          | 75             | 22   | 12         |
| UACC257    | 25                        | 15   | 5          | 50                       | 25   | 15         | 20             | 10   | 9          |
| SW620      | 25                        | 10   | 5          | 15                       | 11   | 7          | 18             | 15   | 15         |
| HCT15      | 25                        | 5    | 1.5        | 30                       | 4    | 3          | 12.5           | 12.5 | 10         |
| SKMEL28    | 15                        | 9    | 2.5        | 25                       | 20   | 2          | 30             | 12   | 5          |
| PC3        | 15                        | 7    | 4          | 30                       | 15   | 12         | 35             | 10   | 9          |
| H322M      | 12                        | 12   | 0.5        | 12                       | 2    | 1          | 6              | 5    | 5          |
| UACC62     | 12                        | 8    | 4          | 25                       | 20   | 12         | 1000           | 800  | 100        |
| MDA-MB-231 | 12                        | 4    | 1          | 14                       | 4    | 2          | 13             | 8    | 8          |
| OVCAR5     | 12                        | 0.8  | 0.6        | 12                       | 1.5  | 1.2        | 8              | 5    | 5          |
| MDA-MB-435 | 0.6                       | 0.3  | 0.2        | 1.5                      | 1    | 1          | 2.5            | 2    | 2          |
| OVCAR3     | 0.5                       | 0.3  | 0.3        | 0.8                      | 0.6  | 0.4        | 3              | 2    | 1          |
| AsPC-1     | 0.5                       | 0.3  | 0.2        | 0.3                      | 0.2  | 0.2        | 5              | 3.5  | 3.5        |
| CAKI-1     | 0.2                       | 0.15 | 0.15       | 0.4                      | 0.3  | 0.1        | 1.75           | 1.75 | 1.75       |
| U2OS       | 0.1                       | 0.1  | 0.1        | 0.2                      | 0.15 | 0.15       | 2.5            | 2.5  | 2.5        |

| cell line  | GI50                      |              |                  |                          |           |            |                    |                |              |
|------------|---------------------------|--------------|------------------|--------------------------|-----------|------------|--------------------|----------------|--------------|
|            | MK-8776 ( $\mu\text{M}$ ) |              |                  | SRA737 ( $\mu\text{M}$ ) |           |            | LY2606368 (nM)     |                |              |
|            | 24 h                      | 48 h         | continuous       | 24 h                     | 48 h      | continuous | 24 h               | 48 h           | continuous   |
| HCT116     | >10, 75, 25               | >10, 75, 10  | 2, 10, 5         | 30, 15                   | 12, 15    | 8, 15      | >100, >100, 300    | >100, >100, 70 | >100, 60, 30 |
| U251       | 30                        | 9            | 2.5              | 30                       | 30        | 9          | 100, 50            | 30, 15         | 15, 10       |
| UACC257    | >10, 25                   | >10, 15      | >10, 5           | 50                       | 25        | 15         | 16, 25             | 8, 12          | 6, 12        |
| SW620      | 25, 25                    | 10, 10       | 4, 5             | 15, 15                   | 10, 12    | 5, 10      | 12, 20, 25         | 10, 15, 20     | 10, 15, 20   |
| HCT15      | 25, 25                    | 1, 8         | 1.5, 1.5         | 30                       | 4         | 3          | 12.5               | 12.5           | 10           |
| SKMEL28    | 15                        | 9            | 2.5              | 25                       | 20        | 2          | 30                 | 12             | 5            |
| PC3        | 15, 12                    | 8, 6         | 5, 3             | 30, 35                   | 20, 12    | 15, 12     | 100, 50, 10, 35    | 25, 12, 7, 8   | 25, 10, 7, 8 |
| H322M      | 12, 20, 8                 | 15, 18, 0.8  | 0.5, 2, 0.4      | 18, 12, 5                | 2, 2, 1.5 | 1, 1, 0.8  | 6, 6               | 5, 4           | 5, 4         |
| UACC62     | 12                        | 8            | 4                | 25                       | 20        | 12         | >100, >1000        | >100, 800      | >100, 100    |
| MDA-MB-231 | 12, 10, 15, 20            | 5, 2.5, 6, 3 | 0.8, 1.8, 0.8, 1 | 17, 10, 25               | 7.5, 1.5  | 3, 1       | 15, 12.5, 12.5, 15 | 10, 8, 7, 10   | 10, 8, 7, 6  |
| OVCAR5     | 12                        | 0.8          | 0.6              | 12                       | 1.5       | 1.2        | 8                  | 5              | 5            |
| MDA-MB-435 | 0.6                       | 0.3          | 0.2              | 1.5                      | 1         | 1          | 2.5, 2             | 2, 1.5         | 2, 1.5       |
| OVCAR3     | 0.5                       | 0.3          | 0.3              | 0.8                      | 0.6       | 0.4        | 3                  | 2              | 1            |
| AsPC-1     | 0.45, 0.5                 | 0.35, 0.2    | 0.2, 0.2         | 0.3                      | 0.2       | 0.2        | 5.5, 4             | 4, 3           | 4, 3         |
| CAKI-1     | <0.4, 0.2, <0.4           | 0.15, <0.4   | 0.15, <0.4       | 0.4, <0.4                | 0.3, <0.4 | 0.1, <0.4  | 2, 1.5             | 2, 1.5         | 2, 1.5       |
| U2OS       | <0.4, 0.1                 | 0.1          | 0.1              | 0.2                      | 0.15      | 0.15       | 2.5                | 2.5            | 2.5          |

| Table S2A. Values for Figure 7A (GI50) |            |                           |      |            |                          |      |            |                |      |            |      |      |      |
|----------------------------------------|------------|---------------------------|------|------------|--------------------------|------|------------|----------------|------|------------|------|------|------|
| parent cell                            | derivative | GI50                      |      |            |                          |      |            |                |      |            |      |      |      |
|                                        |            | MK-8776 ( $\mu\text{M}$ ) |      |            | SRA737 ( $\mu\text{M}$ ) |      |            | LY2606368 (nM) |      |            |      |      |      |
|                                        |            | 24 h                      | 48 h | continuous | 24 h                     | 48 h | continuous | 24 h           | 48 h | continuous |      |      |      |
| AsPC-1                                 | wt         | 0.45                      | 0.35 | 0.2        | 0.3                      | 0.2  | 0.2        |                |      |            | 5.5  | 3.5  | 3.5  |
| AsPC-1                                 | 776R       | 20                        | 8.5  | 2.5        | 40                       | 30   | 15         |                |      |            | 50   | 40   | 40   |
| AsPC-1                                 | SRA-R      | 10                        | 10   | 2          | 40                       | 40   | 20         |                |      |            | 40   | 30   | 30   |
| AsPC-1                                 | LY-R       | 10                        | 6    | 3          | 30                       | 25   | 20         |                |      |            | 2000 | 1000 | 1000 |
| MDA-MB-231                             | wt         | 25                        | 8    | 1.4        | 25                       | 8    | 1.4        |                |      |            | 12.5 | 8    | 7    |
| MDA-MB-231                             | SRA-R      | 35                        | 20   | 15         | 25                       | 6    | 3          |                |      |            | 600  | 200  | 40   |
| MDA-MB-231                             | LY-R       | 40                        | 40   | 20         | 20                       | 10   | 4          |                |      |            | 1800 | 1500 | 1500 |
| H322M                                  | wt         | 12                        | 12   | 0.5        | 12                       | 2    | 1          |                |      |            | 6    | 5    | 5    |
| H322M                                  | SRA-R      | 20                        | 10   | 2          | 35                       | 30   | 15         |                |      |            | 30   | 10   | 8    |
| H322M                                  | LY-R       | 15                        | 10   | 5          | 25                       | 20   | 15         |                |      |            | 900  | 300  | 80   |

| Table S2B. Values for Figure 7B (fold resistance) |            |                 |      |            |        |      |            |           |      |            |     |      |      |
|---------------------------------------------------|------------|-----------------|------|------------|--------|------|------------|-----------|------|------------|-----|------|------|
| parent cell                                       | derivative | fold resistance |      |            |        |      |            |           |      |            |     |      |      |
|                                                   |            | MK-8776         |      |            | SRA737 |      |            | LY2606368 |      |            |     |      |      |
|                                                   |            | 24 h            | 48 h | continuous | 24 h   | 48 h | continuous | 24 h      | 48 h | continuous |     |      |      |
| AsPC-1                                            | wt         | 1               | 1    | 1          | 1      | 1    | 1          | 1         | 1    | 1          | 1   | 1    | 1    |
| AsPC-1                                            | 776R       | 44              | 24   | 12.5       | 133    | 150  | 75         |           |      |            | 9   | 11.4 | 11.4 |
| AsPC-1                                            | SRA-R      | 22              | 28   | 10         | 133    | 200  | 100        |           |      |            | 7.2 | 8.6  | 8.6  |
| AsPC-1                                            | LY-R       | 22              | 17   | 15         | 100    | 125  | 125        |           |      |            | 262 | 285  | 285  |
| MDA-MB-231                                        | wt         | 1               | 1    | 1          | 1      | 1    | 1          |           |      |            | 1   | 1    | 1    |
| MDA-MB-231                                        | SRA-R      | 1               | 0.75 | 2.1        | 1.4    | 0.8  | 1.2        |           |      |            | 48  | 25   | 5.7  |
| MDA-MB-231                                        | LY-R       | 0.8             | 1.25 | 2.9        | 1.6    | 1.6  | 1.6        |           |      |            | 144 | 188  | 214  |
| H322M                                             | wt         | 1               | 1    | 1          | 1      | 1    | 1          |           |      |            | 1   | 1    | 1    |
| H322M                                             | SRA-R      | 1.7             | 0.8  | 4          | 2.9    | 15   | 15         |           |      |            | 5   | 2    | 1.6  |
| H322M                                             | LY-R       | 1.25            | 0.8  | 10         | 2.1    | 10   | 15         |           |      |            | 150 | 60   | 16   |

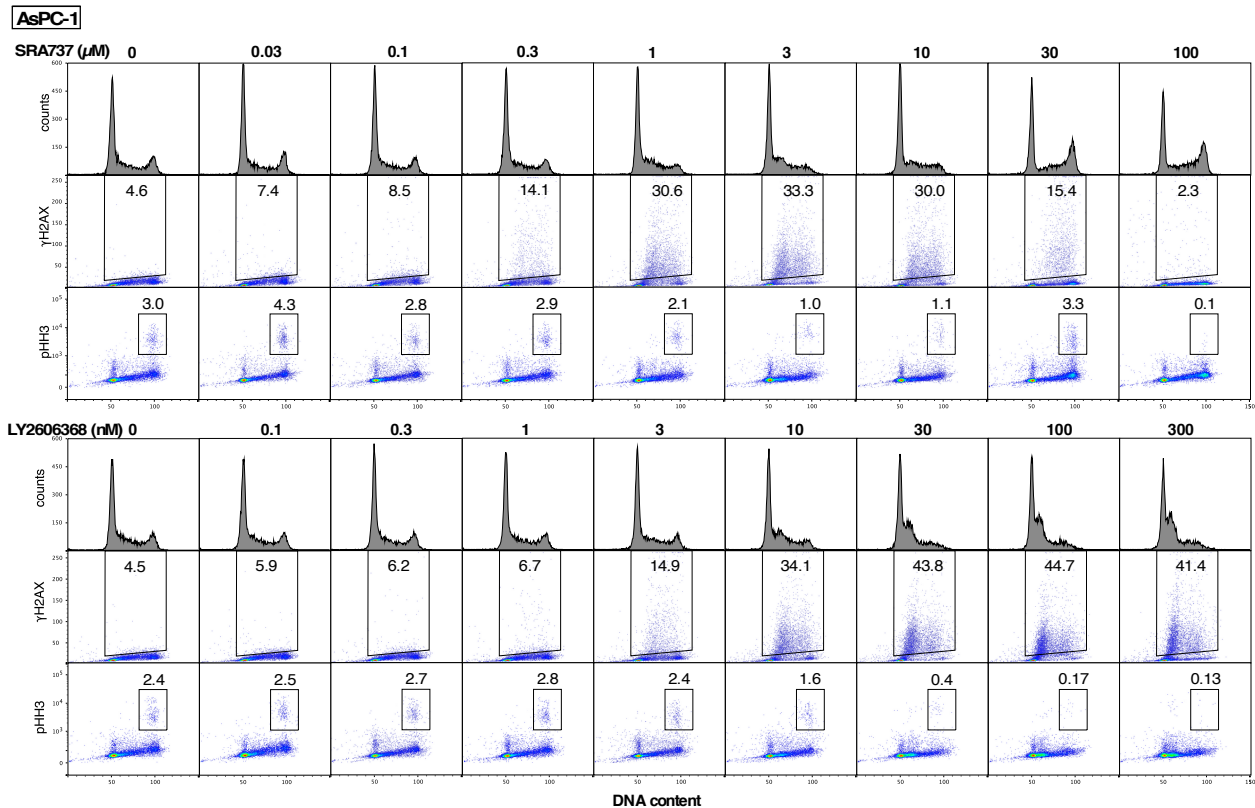

**Figure S1A**

**Figure S1: Induction of  $\gamma\text{H2AX}$  by SRA737 and LY2606368.** A. ASPC-1 cells were incubated with the indicated concentrations of SRA737 (upper panel) or LY2606368 (lower panel) for 6 h, then fixed and analyzed by flow cytometry for DNA content,  $\gamma\text{H2AX}$  and pHH3. B-D. MDA-MB-231, SW620 and H322M cells were incubated with the indicated concentrations of SRA737 (upper panel) or LY2606368 (lower panel) for 6 and 24 h and analyzed as in A. The percentages for  $\gamma\text{H2AX}$  are graphed in Figure 4.

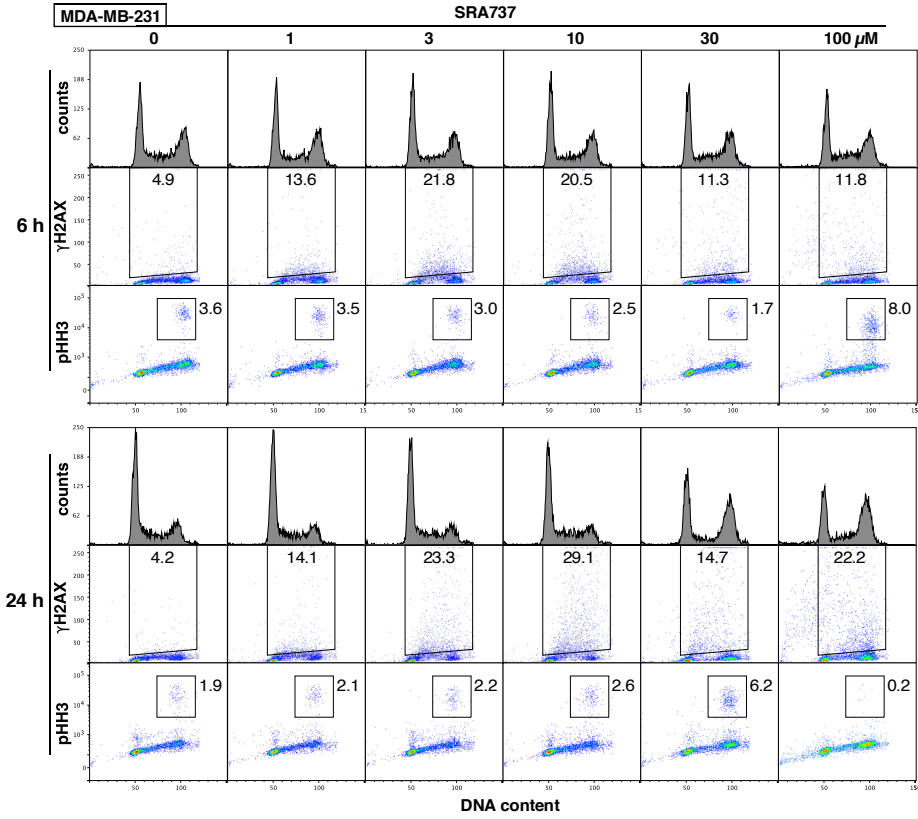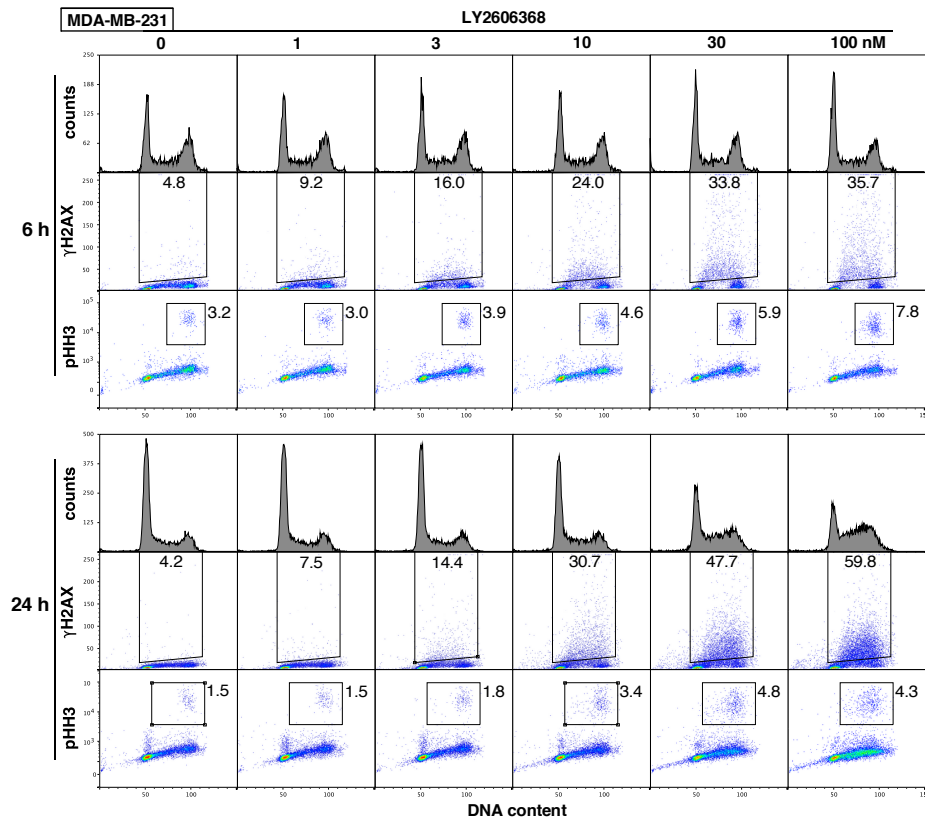

**Figure S1B**

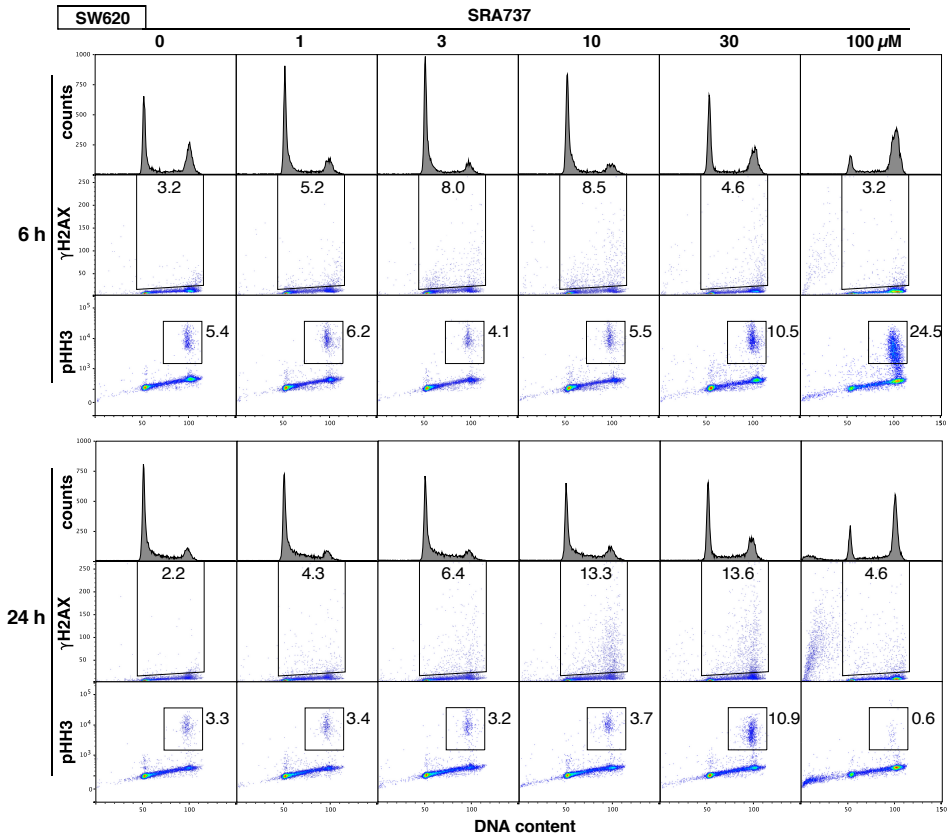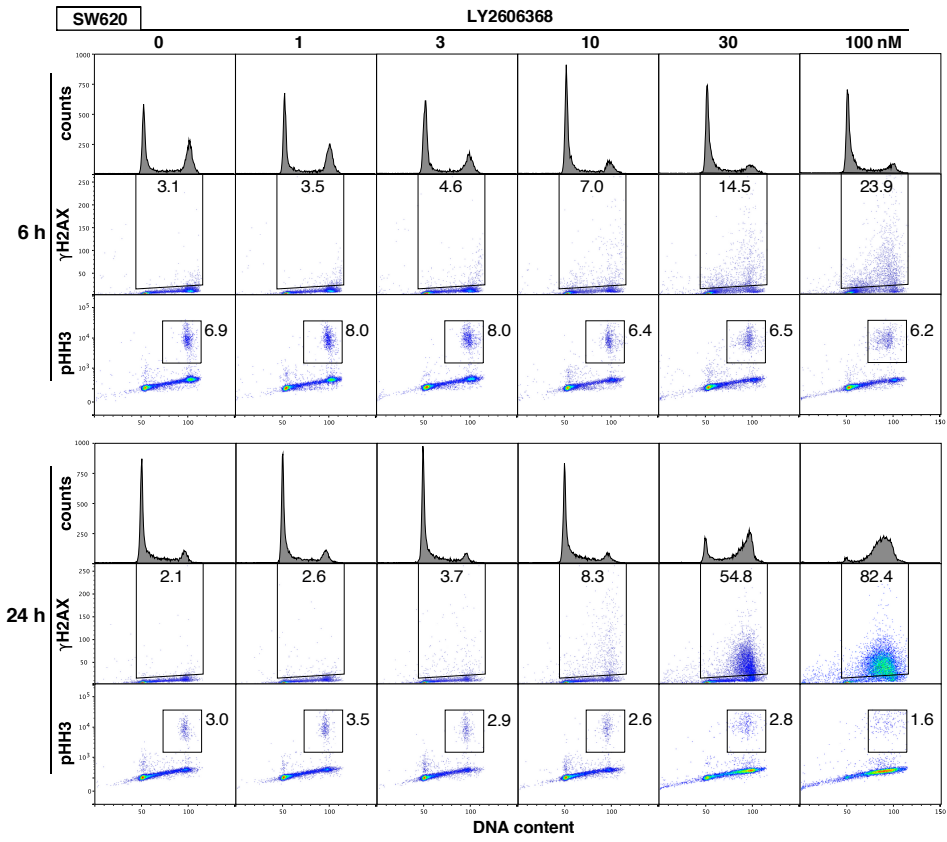

**Figure S1C**

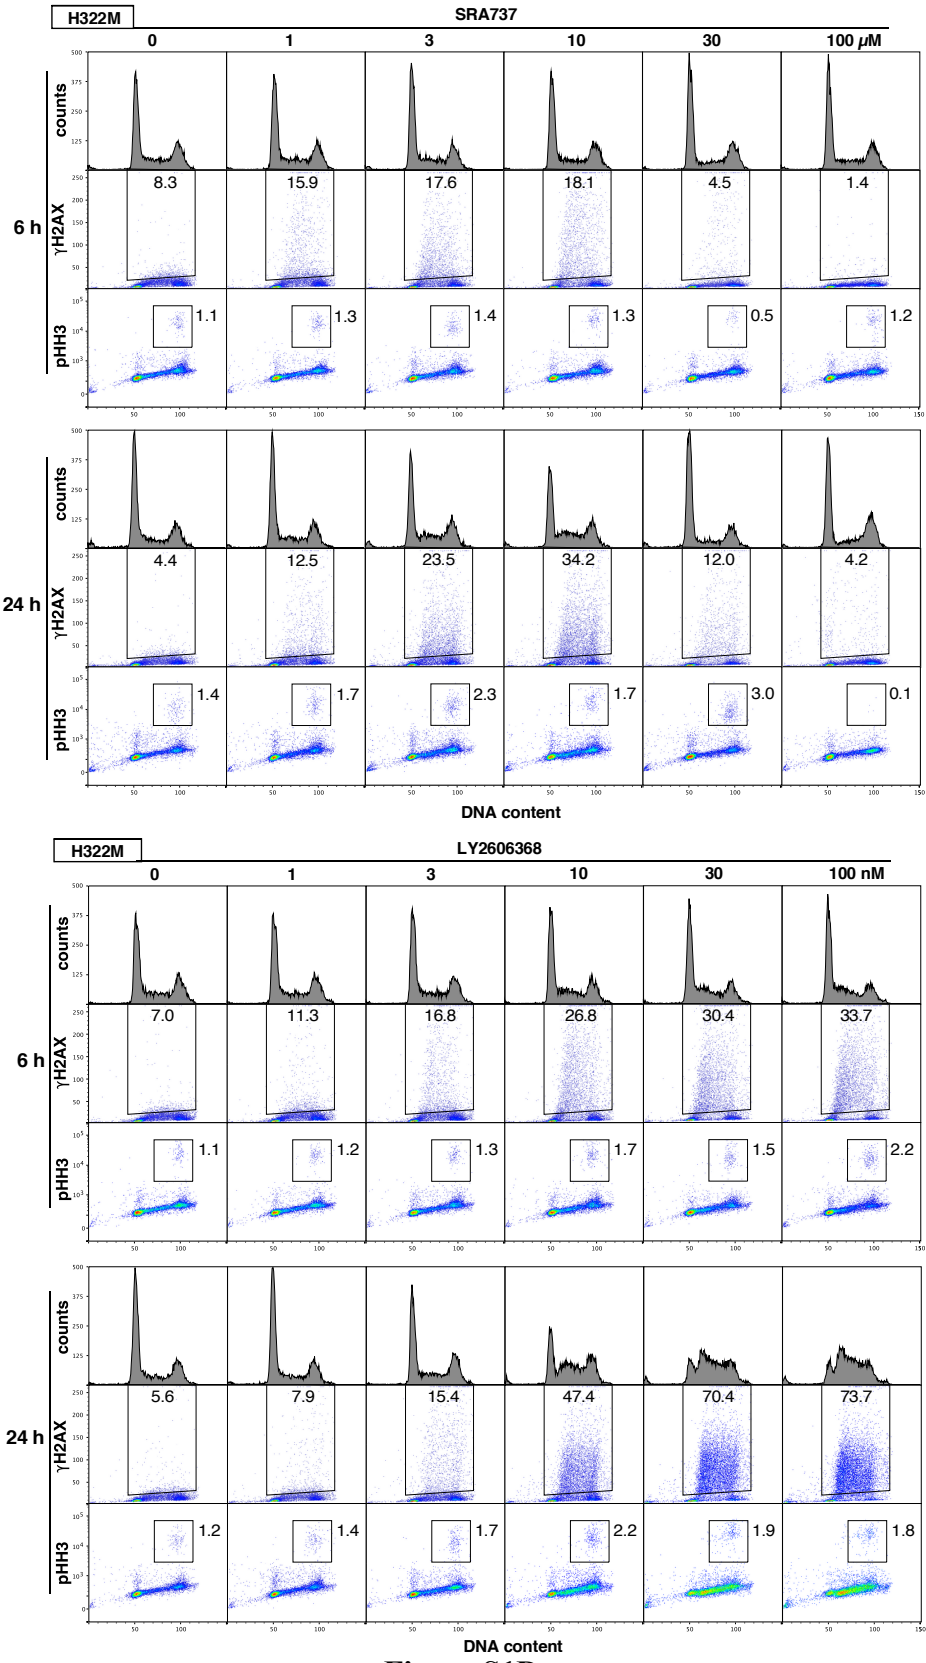

Figure S1D

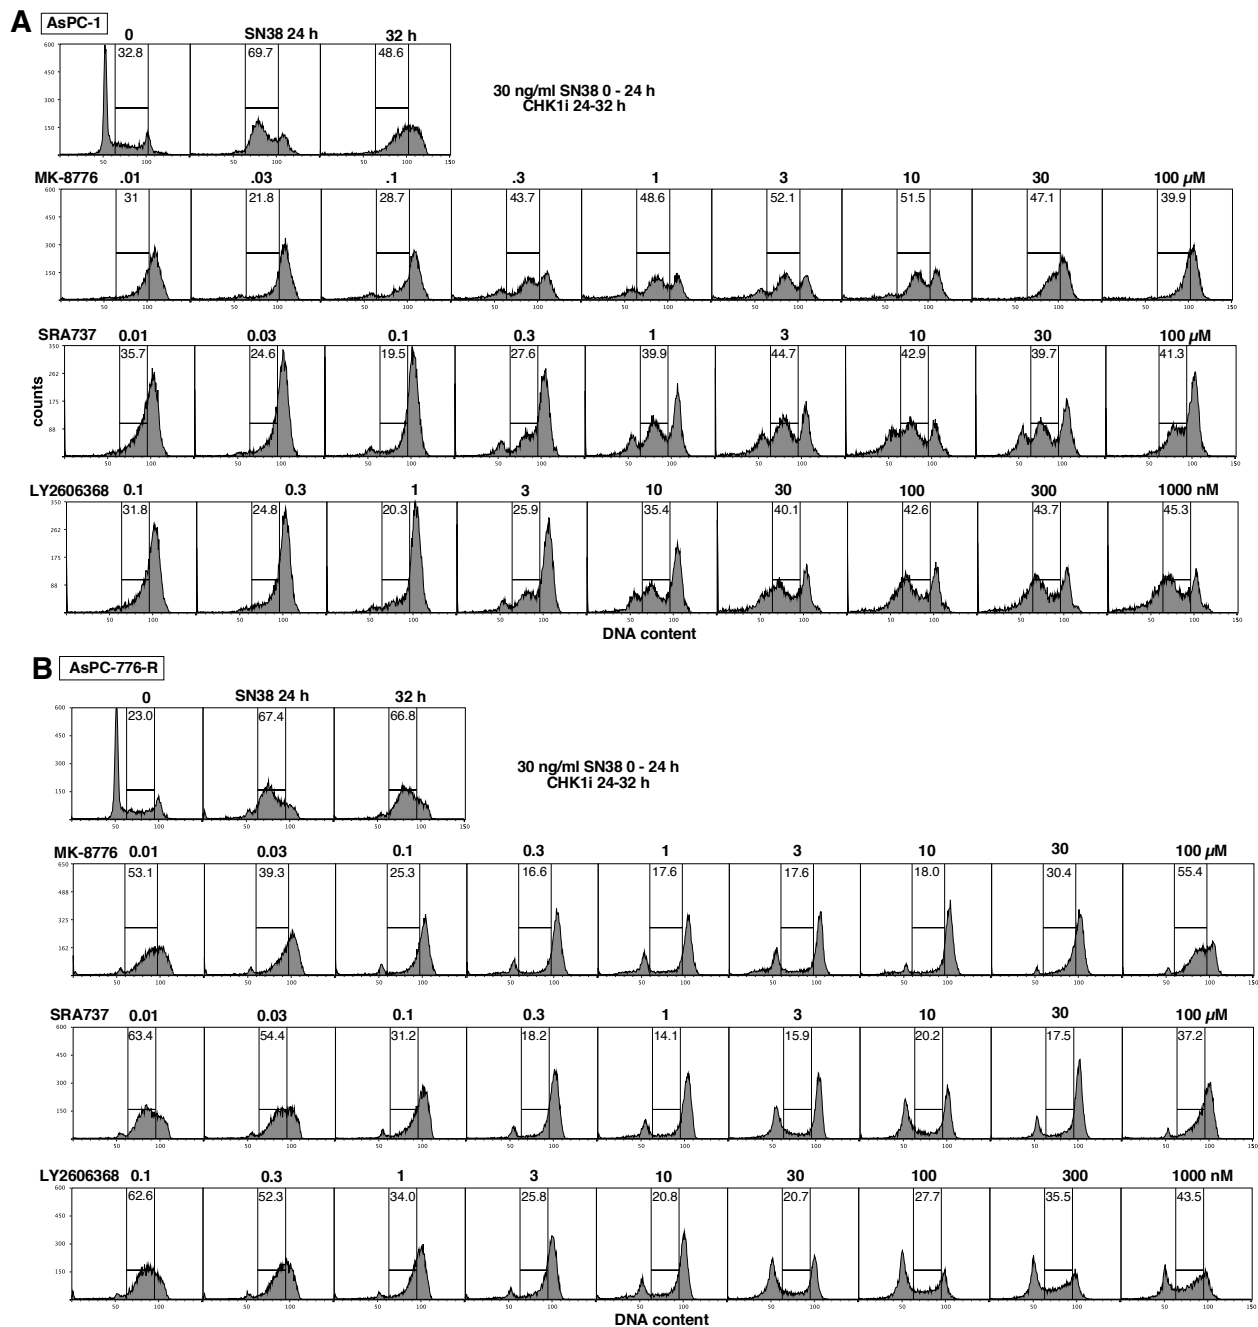

**Figure S2: Abrogation of DNA damage-induced cell cycle arrest by CHK1i in sensitive and resistant cell lines.** **A.** AsPC-1 cells were incubated with 30 ng/mL SN38 (75 nM) for 24 h. SN38 was then removed and cells were incubated with the indicated concentrations of MK8776 (second row), SRA737 (third row), or LY2606368 (bottom row) from 24-32 h. Cells were then fixed and analyzed by flow cytometry for DNA content. **B and C.** AsPC-1 cells with acquired resistance to MK-8776 or LY2606368 were similarly analyzed. **D.** MDA-MB-231 cells with acquired resistance to LY2606368 were incubated with 10 ng/ml SN38 for 24 h followed by each CHK1i from 24-30 h and analyzed as above. The % of cells in S phase are shown, and graphed in Figure 5.



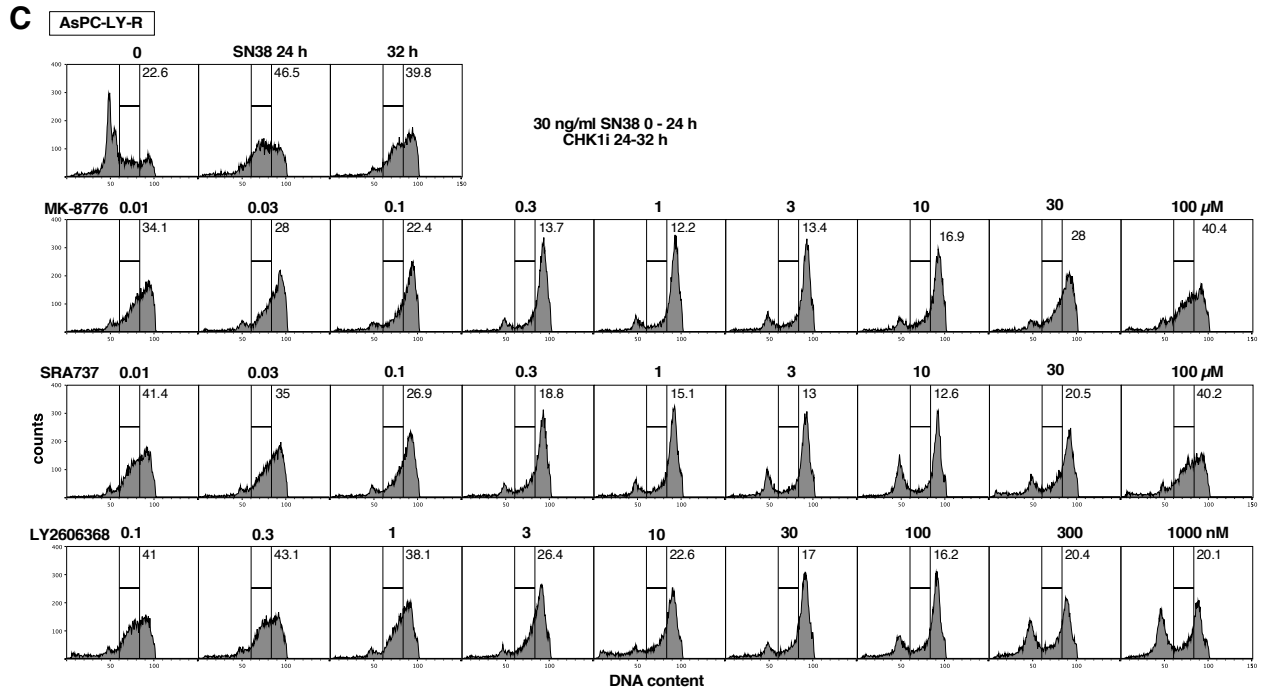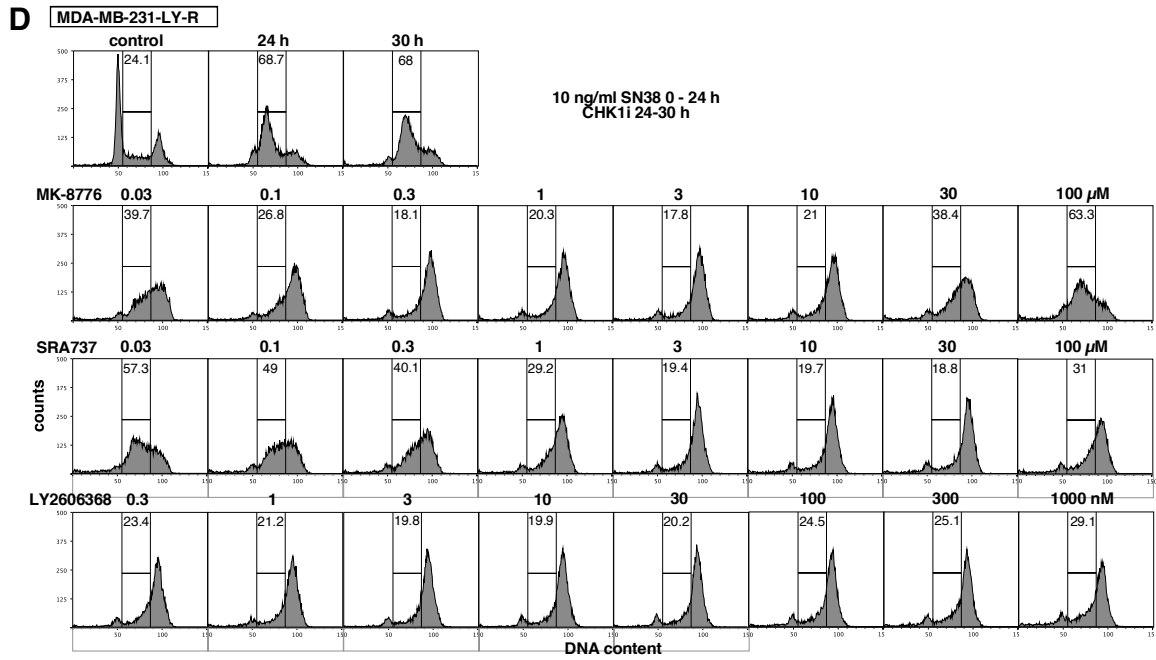

Figure S2C & D

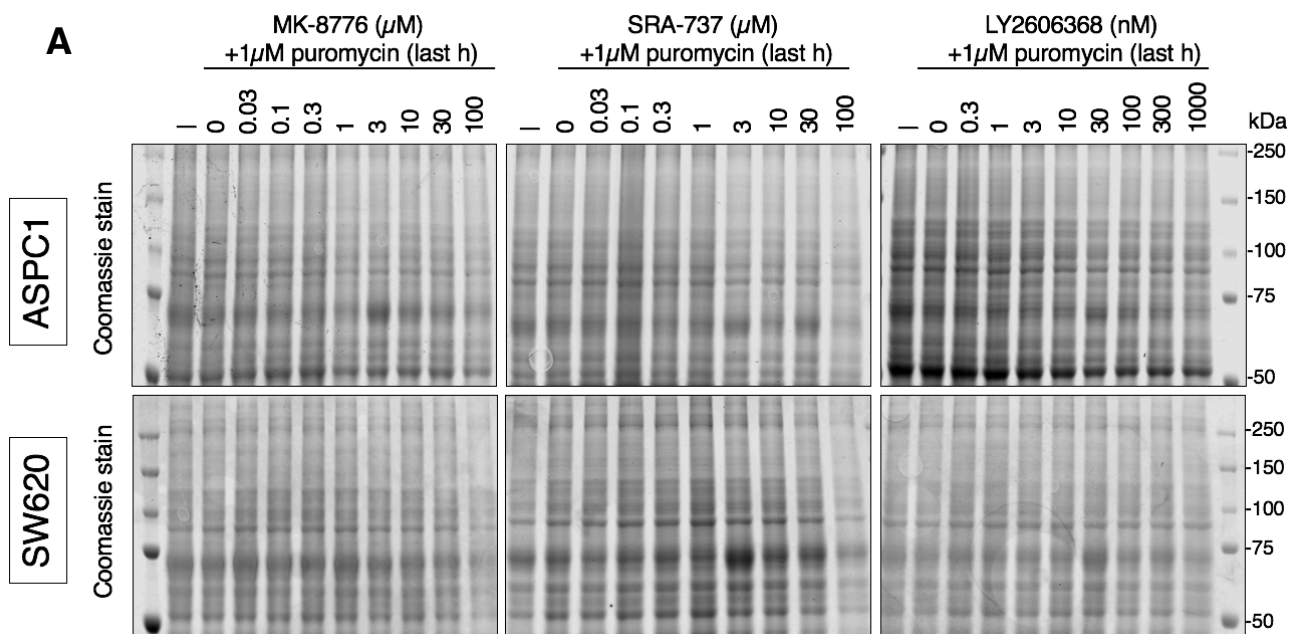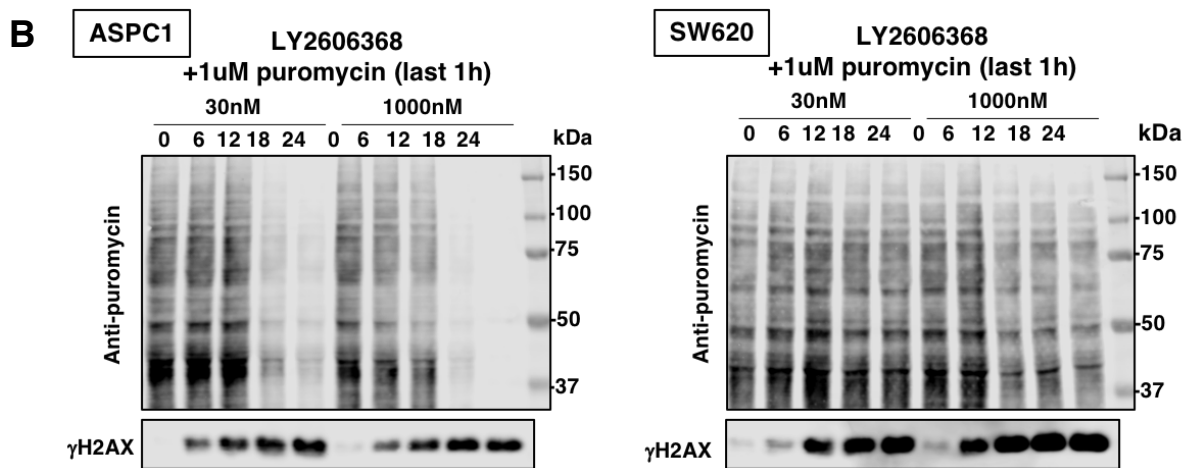

**Figure S3: Inhibition of protein synthesis by CHK1i.** **A.** Lysates from cells analyzed in Figure 7, were electrophoresed on a SDS-PAGE gel and stained with Coomassie blue to confirm that the inhibition of translation was not associated with an overall change in protein. **B.** ASPC-1 and SW620 cells were incubated with either 30 or 1000 nM LY2606368 for 0 – 24 h, and puromycin was added for the final hour. Lysates were analyzed as in Figure 8.
